# Supplementary material for: Genome-wide localization and expression profiling establish Sp2 as a sequence-specific transcription factor regulating vitally important genes
Source: PubMed Central journal article supplement — Nucleic Acids Res. 2012 Jun 7;40(16):7844–57. doi: 10.1093/nar/gks544 (PMC3439921; doi:10.1093/nar/gks544), 2012-06-07
Supplement: supp_gks544_nar-01146-v-2012-File010.pdf [file supp_gks544_nar-01146-v-2012-File010.pdf]

## **Supplementary Data (Terrados *et al.*)**

**Supplementary Dataset S1** MEF Sp2 ChIP-Seq data set obtained with Ab1 and Ab2 (FDR<0.001). (XLS)

**Supplementary Dataset S2 HEK293** Sp2 ChIP-Seq data set obtained with Ab1 (FDR<0.001). (XLS)

**Supplementary Dataset S3** Pathway analysis of Sp2 target genes in MEFs. (XLS)

**Supplementary Dataset S4** Pathway analysis of Sp2 target genes in HEK293 cells. (XLS)

**Supplementary Dataset S5** List of  $\geq 1.5$  fold de-regulated genes after short-term depletion of Sp2 in MEFs. (XLS)

**Supplementary Dataset S6** List of  $\geq 1.5$  fold de-regulated genes after long-term depletion of Sp2 in MEFs. (XLS)

**Supplementary Dataset S7** Pathway analysis of direct Sp2 target genes repressed  $\geq 1.5$  fold. (XLS)

**Supplementary Dataset S8** Pathway analysis of direct Sp2 target genes activated  $\geq 1.5$  fold. (XLS)

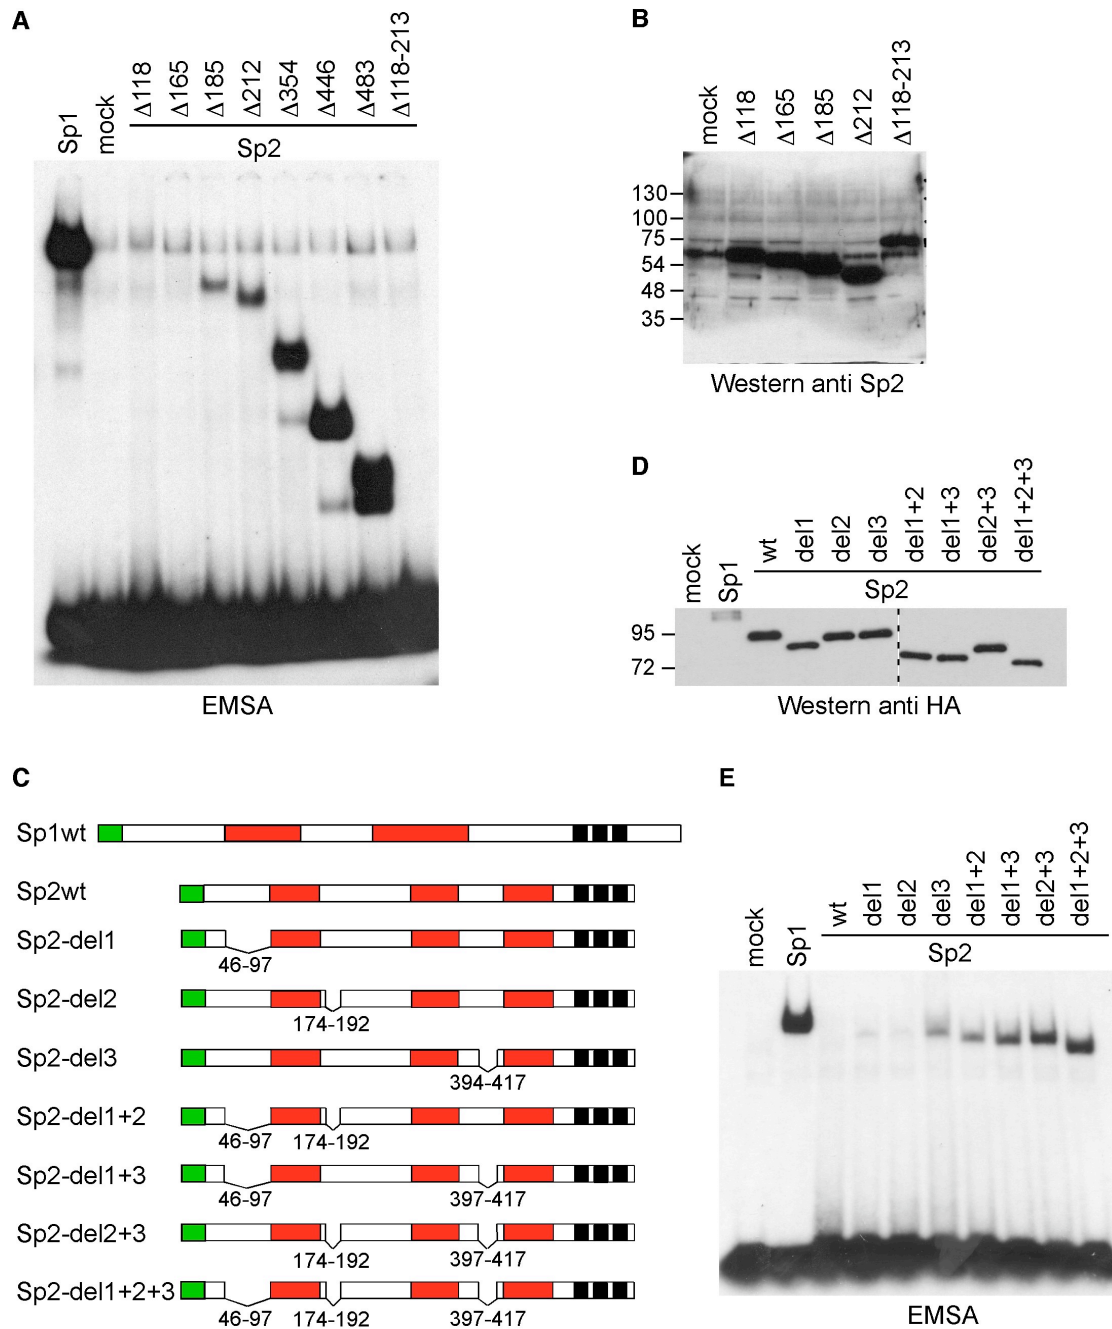

**Supplementary Figure S1.** Electrophoretic mobility shift analysis of Sp2 mutants. Various N-terminal and internal deletion mutants of Sp2 were transiently transfected in SL2 cells. Crude nuclear extracts were subsequently analysed by EMSA and Western blotting. Sp1-transfected cells were used as a positive and mock-transfected cells as a negative control. **(A)** EMSA with progressive N-terminal Sp2 deletion mutants. **(B)** Western blot analysis of N-terminal Sp2 deletion mutants. **(C)** Schematic drawing of internal HA-tagged Sp2 deletion mutants. The three zinc fingers of the DNA binding domain are indicated by black boxes. Glutamine-rich regions are highlighted in red and the HA epitope in green. **(D)** Western blot analysis of Sp1 and of internal Sp2 deletion mutants expressed in SL2 cells. **(E)** EMSA with nuclear extracts containing Sp2 mutant proteins with internal deletions.

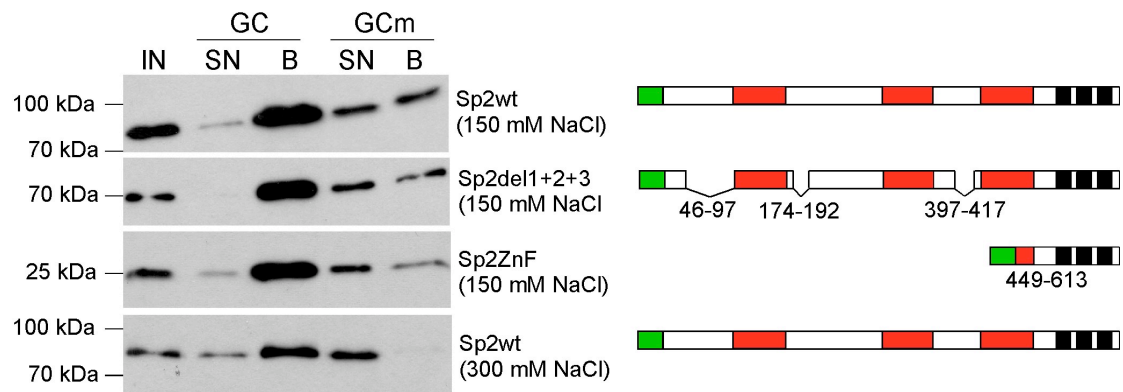

**Supplementary Figure S2.** DNA affinity precipitation assay (DAPA) analysis of Sp2 mutants. Expression constructs for full-length Sp2 (Sp2wt), Sp2del1+2+3 and Sp2ZnF were transiently transfected in SL2 cells. Crude nuclear extracts were subsequently subjected to DAPA using a biotinylated GC box oligonucleotide (GC) and an oligonucleotide with a mutation in the Sp recognition sequence (GCm). Bound Sp2 proteins were subsequently analysed by Western blotting (anti HA). IN, input 2.5%; SN, supernatant (unbound protein) 2.5%; B, bound protein 80%. Residual binding to the GCm oligonucleotide could be prevented by high salt concentrations. A schematic drawing of HA-tagged Sp2 mutants is shown on the right side. The three zinc fingers of the DNA binding domain are indicated by black boxes. Glutamine-rich regions are highlighted in red and the HA epitope in green.

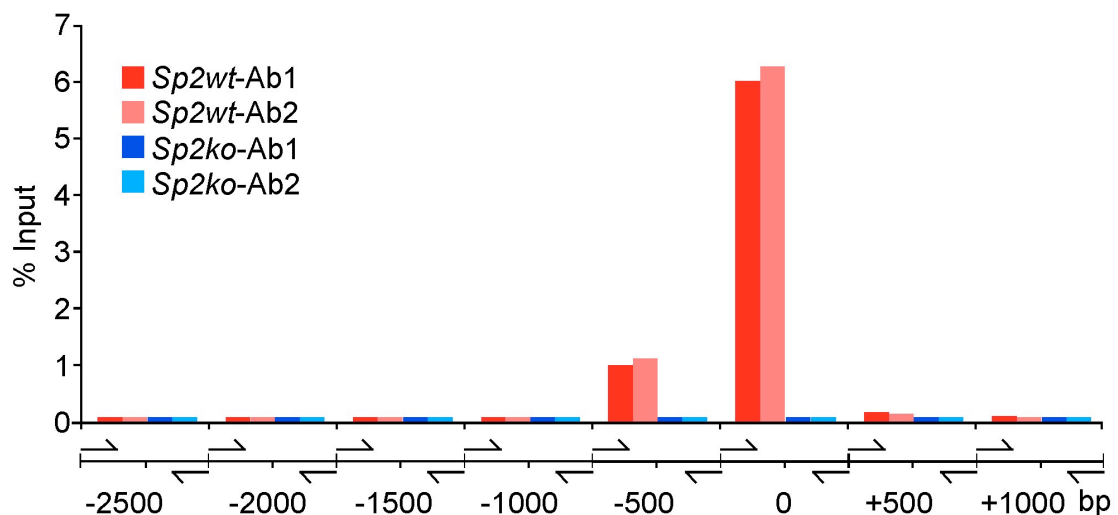

**Supplementary Figure S3.** ChIP-qPCR promoter walk for binding of Sp2 to its own promoter. Two different Sp2 antibodies were used for ChIP-qPCR analysis of the *Sp2* gene in wild type (*wt*) and in *Sp2ko* MEFs (*ko*). Amplification of chromosomal regions from -2500 bp to +1000 bp relative to the TSS was with eight primer pairs indicated by arrows. ChIP-qPCR values are represented as % of input.

**Supplementary Table S1.** Primers for ChIP-qPCR analyses.

| <b>Gene</b>          | <b>Primer</b> | <b>Sequence</b>           |
|----------------------|---------------|---------------------------|
| <i>Cyp51</i>         | Fw            | 5'-TCTTGGTACAGCAGCACACC   |
|                      | Rv            | 5'-ATGTCACCTCTGGGCTTTGT   |
| <i>Cyth2</i>         | Fw            | 5'-CTGCAACCCAAGGTTGAGAC   |
|                      | Rv            | 5'-TGGCAGCTTTATCCTCCAAT   |
| <i>Hmgcr</i>         | Fw            | 5'-ACCCTGCAGGTCAAACCTCTG  |
|                      | Rv            | 5'-CGAACGGTCTCCCTAACAAAC  |
| <i>Hmgcs1</i>        | Fw            | 5'-AGGGAAAACCTAGCGAGTC    |
|                      | Rv            | 5'-AAGAACGAGCAAAGCAAGGA   |
| <i>Hsd17b7</i>       | Fw            | 5'-CTCGGCCTATCTCACCTCAC   |
|                      | Rv            | 5'-CCCTGCACCGAAGTAGAACT   |
| <i>Mvd</i>           | Fw            | 5'-GGCTATCCAGTGGTGCTTGT   |
|                      | Rv            | 5'-AGCCTATGGACAGGATCGAA   |
| <i>Mvk</i>           | Fw            | 5'-CCTCTCAATCGCTGTTTCCT   |
|                      | Rv            | 5'-CTTCCTGAGGCCAATCAGAG   |
| <i>Nfatc2ip</i>      | Fw            | 5'-ACCAACCAGGAAAATGGATT   |
|                      | Rv            | 5'-CACACTGCTTCCACAAACA    |
| <i>Pmvk</i>          | Fw            | 5'-TATGTTTGGCCGGTTGTGTA   |
|                      | Rv            | 5'-GAAAGAGCCTTGCAGCCTAGT  |
| <i>Sp2 (TSS)</i>     | Fw            | 5'-CCAGACCAACGTCACTCTAG   |
|                      | Rv            | 5'-TACGACATCTTCCTCCCTGG   |
| <i>Sp2 (+500bp)</i>  | Fw            | 5'-TGGTCTGAACTGCAGCCTGCT  |
|                      | Rv            | 5'-TAGGTCATCTGTTACGAGCG   |
| <i>Sp2 (+1000bp)</i> | Fw            | 5'-TAGAGGCCTGTCAACGAGGA   |
|                      | Rv            | 5'-TGTGCCAGTTCCTGTGAGC    |
| <i>Sp2 (-500bp)</i>  | Fw            | 5'-AATTCCTCTAGGAAGTGCC    |
|                      | Rv            | 5'-GCCAATCAGAAGTGCTACTG   |
| <i>Sp2 (-1000bp)</i> | Fw            | 5'-GTGAGTGCTCTGGCTTCAAC   |
|                      | Rv            | 5'-TGCTTGGTCTCTGCTTCATC   |
| <i>Sp2 (-1500bp)</i> | Fw            | 5'-CAAAGTCAGAGATCTGCCAG   |
|                      | Rv            | 5'-GTCCCAACACTAAGCATGA    |
| <i>Sp2 (-2000bp)</i> | Fw            | 5'-GTTGCTGTGTCTCACAAAGC   |
|                      | Rv            | 5'-TCAGATGCTATCAGTTCTGG   |
| <i>Sp2 (-2500bp)</i> | Fw            | 5'-CTATTGGTACCAGTTGGGTC   |
|                      | Rv            | 5'-CTATCCTGCTGGGTGGAAAC   |
| <i>Srebf-2</i>       | Fw            | 5'-GGTGCGTTAACCCCTTCTATTT |
|                      | Rv            | 5'-CCCCCAAGTTTGTGTCAAT    |
| <i>Stat1</i>         | Fw            | 5'-TTGTAAACACAACCCCTGTG   |
|                      | Rv            | 5'-GCTGAAAACCGAAAGTACCG   |
| <i>Tbp</i>           | Fw            | 5'-CCAAGTGTTCGCTACACA     |
|                      | Rv            | 5'-CACATCTGATGCCGTCCTT    |
| <i>Tcerg1</i>        | Fw            | 5'-GGGTGAGTTGATTTAGACAGC  |
|                      | Rv            | 5'-ACTAATAGCGCAAGCCGAGA   |

**Supplementary Table S2.** Primers for RT-qPCR analyses.

| <b>Gene</b>    | <b>Primer</b> | <b>Sequence</b>           |
|----------------|---------------|---------------------------|
| <i>Cyp51</i>   | Fw            | 5'-CAGGGTACACCATTTCCTCCA  |
|                | Rv            | 5'-TCTCCAACACAACGATGACG   |
| <i>Ebp</i>     | Fw            | 5'-AGCTTCGTCGTCTGTATGGA   |
|                | Rv            | 5'-GCTGGAGTCCTTCGTGTAGC   |
| <i>Etv5</i>    | Fw            | 5'-CGTTGGGGTATCCAGAAGAA   |
|                | Rv            | 5'-CATTCGGATTCTGCCTTCAG   |
| <i>Fdft1</i>   | Fw            | 5'-ACACTGGCTGCCTGTTACAA   |
|                | Rv            | 5'-ATGACCTGCTTGGTTTTGCT   |
| <i>Foxo1</i>   | Fw            | 5'-GCTTGGACTGTGACATGGAG   |
|                | Rv            | 5'-ACTGCTCCTCAGTTCCTGCT   |
| <i>Foxo3</i>   | Fw            | 5'-GGGGAACCTTCACTGGTGCTA  |
|                | Rv            | 5'-GGGCTGCTAACAGTCTCTGC   |
| <i>Gabpa</i>   | Fw            | 5'-TGGGGACAACGTAAGAACAAG  |
|                | Rv            | 5'-CCAGACGGTTCAGTTCTGCT   |
| <i>Gapdh</i>   | Fw            | 5'-GAGGCGGGTCCAAAGAGAG    |
|                | Rv            | 5'-AGAAGATGCGGCCGTCTCTG   |
| <i>Hdac6</i>   | Fw            | 5'-CTGGTCCTCAGCTGTGTTGA   |
|                | Rv            | 5'-ACGGACTGCGGTGAACTAAG   |
| <i>Hmgcr</i>   | Fw            | 5'-TGGGGCTCGTGCATAGTAAC   |
|                | Rv            | 5'-CAAGGAGCATGCAAAGACAA   |
| <i>Hmgcs1</i>  | Fw            | 5'-GGATCCTCAAGCTGCCTTC    |
|                | Rv            | 5'-TCCCAAGACATCCATTCCTC   |
| <i>Hsd17b7</i> | Fw            | 5'-CACCAAAAACCGGAGTCTCT   |
|                | Rv            | 5'-AGGAACGCCTACATCAGCTC   |
| <i>Jun</i>     | Fw            | 5'-TCCCCTATCGACATGGAGTC   |
|                | Rv            | 5'-GCTTAAGCTGTGCCACCTGT   |
| <i>Kdm3a</i>   | Fw            | 5'-TGGGGATGTGGTGTATCC     |
|                | Rv            | 5'-TGCATCTTTCAGTGCATGGT   |
| <i>Kdm4b</i>   | Fw            | 5'-GTTTGAGGATGGGTCTCAGC   |
|                | Rv            | 5'-ACAGGAGTGGGCAGGATCTA   |
| <i>Mad2l2</i>  | Fw            | 5'-CTCCTGTCTCATGTGGAGCA   |
|                | Rv            | 5'-TGGACATCCTGTTTCATCTGC  |
| <i>Mvk</i>     | Fw            | 5'-CAGCACCATCTGAATGCTCT   |
|                | Rv            | 5'-CTGGTCTCCAGCAGTCAA     |
| <i>Mvd</i>     | Fw            | 5'-GGTGGCACCTGTTCTTCTCT   |
|                | Rv            | 5'-CTTTCTCCAAATGGCACTGG   |
| <i>Nlk</i>     | Fw            | 5'-AGTTAAGGCGCACCATCATC   |
|                | Rv            | 5'-CATCTTCAATTCCCGGAAGA   |
| <i>Pmvk</i>    | Fw            | 5'-CTCGGAGCAGAGTCGACAG    |
|                | Rv            | 5'-CCCCTCAAGCCTCATCACTA   |
| <i>Stat1</i>   | Fw            | 5'-TTTCCCCTATGGAAATCAGAC  |
|                | Rv            | 5'-CTGGAGATTACGCTTGCTTT   |
| <i>Srebf-2</i> | Fw            | 5'-CATCCAGCAGCCTTTGATATAC |
|                | Rv            | 5'-AATGATCTGAGGTTGCACCA   |
| <i>Taf13</i>   | Fw            | 5'-GTCCGTGGACATTCTCGAAG   |
|                | Rv            | 5'-GCTTTTCTAGCCCGTTTCAA   |

|            |    |                          |
|------------|----|--------------------------|
| <i>Tbp</i> | Fw | 5'-TCAAACCCAGAATTGTTCTCC |
|            | Rv | 5'-TGGTCTTCCTGAATCCCTTT  |

**Supplementary Table S3.** List of gene abbreviations.

| <b>Gene</b>   | <b>Description</b>                                              | <b>Gene ID</b> |
|---------------|-----------------------------------------------------------------|----------------|
| <i>Aacs</i>   | Acetoacetyl-CoA Synthetase                                      | 78894          |
| <i>Acat2</i>  | Acetyl-CoA Acetyltransferase 2                                  | 110460         |
| <i>Acly</i>   | ATP-Citrate Lyase                                               | 104112         |
| <i>Acss2</i>  | Acyl-CoA Synthetase 2                                           | 60525          |
| <i>Baz1b</i>  | Bromodomain adjacent to zinc finger domain, 1B                  | 22385          |
| <i>Brd8</i>   | Bromodomain containing 8                                        | 78656          |
| <i>Crem</i>   | cAMP responsive element modulator                               | 12916          |
| <i>Cyp51</i>  | Lanosterol 14 $\alpha$ -Demethylase                             | 13121          |
| <i>Cyth2</i>  | Cytohesisin 2                                                   | 19158          |
| <i>Dhcr24</i> | Desmosterol Reductase                                           | 74754          |
| <i>Dhcr7</i>  | 7-Dehydrocholesterol Reductase                                  | 13360          |
| <i>Ebp</i>    | 3 $\beta$ -Hydroxysteroid- $\Delta^8, \Delta^7$ -Isomerase      | 13595          |
| <i>Elk4</i>   | ETS domain-containing protein                                   | 13714          |
| <i>Etv5</i>   | Ets variant gene 5                                              | 104156         |
| <i>Fdps</i>   | Farnesyl Diphosphate Synthase                                   | 110196         |
| <i>Fdfts</i>  | Squalene Synthase                                               | 14137          |
| <i>Foxo1</i>  | Forkhead box O1                                                 | 56458          |
| <i>Foxo3</i>  | Forkhead box 3                                                  | 56484          |
| <i>Gapdh</i>  | Glyceraldehyde-3-phosphate dehydrogenase                        | 14433          |
| <i>Gabpa</i>  | GA binding protein transcription factor, alpha subunit<br>60kDa | 14390          |
| <i>Hdac6</i>  | Histone deacetylase 6                                           | 15185          |
| <i>Hltf</i>   | Helicase-like transcription factor                              | 20585          |
| <i>Hmgcs1</i> | 3-hydroxy-3-methylglutaryl-CoA Synthase                         | 208715         |
| <i>Hmgcr</i>  | 3-hydroxy-3-methylglutaryl-CoA reductase                        | 15357          |

|                 |                                                                                               |                                  |
|-----------------|-----------------------------------------------------------------------------------------------|----------------------------------|
| <i>Hsd17b7</i>  | 17- $\beta$ -hydroxysteroid Dehydrogenase 7                                                   | 15490                            |
| <i>Idi1</i>     | Isopentenyl Diphosphate- $\Delta$ -Isomerase                                                  | 319554                           |
| <i>Irx2</i>     | Iroquois related homeobox 2                                                                   | 16372                            |
| <i>Jun</i>      | Proto-oncogene c-Jun                                                                          | 16476                            |
| <i>Kdm3a</i>    | Lys-specific demethylase 3a                                                                   | 104263                           |
| <i>Kdm4b</i>    | Lys-specific demethylase 4b                                                                   | 193793                           |
| <i>Klf9</i>     | Kruppel-like factor 9                                                                         | 16601                            |
| <i>L3mbtl2</i>  | Lethal(3)malignant brain tumor-like protein 2                                                 | 214669                           |
| <i>Lss</i>      | Lanosterol Cyclase                                                                            | 16987                            |
| <i>Mad2l2</i>   | MAD2 mitotic arrest deficient-like 2                                                          | 71890                            |
| <i>Meis</i>     | myeloid ecotropic viral integration site 1 homolog                                            | 17268<br>17536<br>17537          |
| <i>Mllt1</i>    | Myeloid/lymphoid or mixed lineage-leukemia translocation to 1                                 | 64144                            |
| <i>Msh2</i>     | MutS protein homolog 2                                                                        | 17685                            |
| <i>Mvd</i>      | Mevalonate Pyrophosphate Decarboxylase                                                        | 192156                           |
| <i>Mvk</i>      | Mevalonate kinase                                                                             | 17855                            |
| <i>Mxd1</i>     | MAX dimerization protein 1                                                                    | 17119                            |
| <i>Ncoa2</i>    | Nuclear receptor coactivator 2                                                                | 17978                            |
| <i>Nfatc2ip</i> | Nuclear factor of activated T-cells, cytoplasmic, calcineurin-dependent 2 interacting protein | 18019                            |
| <i>Nfia</i>     | Nuclear factor 1 A-type                                                                       | 18027                            |
| <i>NfY</i>      | Nuclear transcription factor Y                                                                | 18044<br>18045<br>18046          |
| <i>Nlk</i>      | Nemo like Kinase                                                                              | 18099                            |
| <i>Nsdhl</i>    | NAD(P)H Steroid Dehydrogenase like                                                            | 18194                            |
| <i>Pax9</i>     | Paired box gene 9                                                                             | 18511                            |
| <i>Pbx</i>      | pre-B-cell leukemia homeobox                                                                  | 18514<br>18515<br>18516<br>80720 |
| <i>Pmvk</i>     | Phosphomevalonate kinase                                                                      | 10654                            |
| <i>Rsf1</i>     | Remodeling and spacing factor 1                                                               | 233532                           |

|                 |                                                         |        |
|-----------------|---------------------------------------------------------|--------|
| <i>Sc4mol</i>   | Sterol C4-Methyl Oxidase                                | 66234  |
| <i>Sc5d</i>     | Sterol C5-Desaturase                                    | 235293 |
| <i>Sp1</i>      | Specificity protein 1 transcription factor              | 20683  |
| <i>Sp2</i>      | Specificity protein 2 transcription factor              | 78912  |
| <i>Sp3</i>      | Specificity protein 3 transcription factor              | 20687  |
| <i>Sp4</i>      | Specificity protein 4 transcription factor              | 20688  |
| <i>Sqle</i>     | Squalene Epoxidase                                      | 20775  |
| <i>Stat1</i>    | Signal transducer and activator of transcription 1      | 20846  |
| <i>Stat2</i>    | Signal transducer and activator of transcription 2      | 20847  |
| <i>Taf13</i>    | TATA box binding protein (TBP)-associated factor, 18kDa | 99730  |
| <i>Tbp</i>      | TATA box binding protein                                | 21374  |
| <i>Tbx3</i>     | T-box protein 3                                         | 21386  |
| <i>Tcerg1</i>   | Transcription elongation regulator 1                    | 56070  |
| <i>Tle1</i>     | Transducin-like enhancer of split 1                     | 21885  |
| <i>Tm7sf2</i>   | Sterol C14-Reductase                                    | 73166  |
| <i>Trp53bp1</i> | Transformation related protein 53 binding protein 1     | 27223  |
| <i>Ung</i>      | Uracil DNA glycosylase                                  | 22256  |
